# Supplementary material
Source: publisher figshare collection journal article supplement (https://asha.figshare.com/articles/dataset/_/23661876)
Supplement: Supplementary file 1 [file 1]

## **Supplemental Material S2.** Focus groups guided, semistructured questions.

### *Focus Group #1*

- (Broad) I'm interested in finding out more about your experience with the administration of the screener.
- (Specific) I'm interested in finding out more about how you felt about the screening administration. For example, was it difficult to administer?
- (Broad) I'm interested in finding out more about your experience with the training of the screener.
- (Specific) I'm interested in finding out what your experiences were with the training for the RSR task. Was it too long, too in-depth, not enough in-depth, etc. What would you change? What would you keep the same?
- (Broad) What kind of facilitators and/or barriers do you think may exist in the school district with doing annual screening for language impairment from your perspective?
- (Specific) Who (what personnel) do you think should be involved in administering annual screening for language impairment?
- (Specific) What kind of support do you think annual screening for language impairment might gain from district SLPs?

### *Focus Group #2*

- (Broad) What kind of barriers do you think may exist in the school district with doing annual screening for language impairment from **your perspective?**
- (Broad) What kind of facilitators do you think may exist in the school district with doing annual screening for language impairment from **your perspective?**
- (Specific) I'm interested in finding out what your thoughts are regarding how annual screening may be received by parents of students in DSD.
- (Specific) Who (what personnel) do you think should be involved in administering annual screening for language impairment? For example, District TA's, SLTs, GA teachers, parents, etc.
- (Specific) What kind of support do you think annual screening for language impairment might garner from team members at the school and/or district level?
