# Supplementary material
Source: publisher figshare collection journal article supplement (https://asha.figshare.com/articles/dataset/_/23661876)
Supplement: Supplementary file 2 [file 1]

## **Supplemental Material S1. Survey instrument.**

### **Part 1**

I have read the consent statement and want to participate in the survey

*Yes*

*No*

### **Part 2**

What is your position in Davis School District?

*SLP*

*General Education Teacher*

Years of practicing or teaching experience

*less than 4 years*

*5-9 years*

*10-14 years*

*15-19 years*

*20-24 years*

*more than 25 years*

Level of college education

*some undergraduate training*

*undergraduate degree*

*some master's level training*

*master's degree*

*some PhD level training*

*PhD degree*

Current caseload size: (For SLPs only. GE teachers select "does not apply to me")

*part-time caseload*

*full-time case load: less than 30 students*

*full-time case load: 30-49 students*

*full-time case load: 50-69 students*

*full-time case load: 70-89 students*

*full-time case load: more than 90 students*

*does not apply to me*

Gender

*female*

*male*

*unassigned*

*I prefer not to answer*

## Age

29 or younger  
30-39  
40-49  
50-59  
60 or older  
I prefer not to answer

## Part 3

Yearly screenings (e.g., hearing, vision, reading, etc.) are an effective way of identifying children with developmental difficulties.

*strongly agree*      *agree*      *neutral*      *disagree*      *strongly disagree*

Yearly screening, compared to a referral-based approach, is more effective for identifying school-aged children with language impairment.

*strongly agree*      *agree*      *neutral*      *disagree*      *strongly disagree*

A yearly screening format for language impairment identification would be well-received by district general education teachers.

*strongly agree*      *agree*      *neutral*      *disagree*      *strongly disagree*

A yearly screening format for language impairment identification would be well-received by district speech-language pathologists.

*strongly agree*      *agree*      *neutral*      *disagree*      *strongly disagree*

A yearly screening format would place an unmanageable burden on district speech-language pathologists.

*strongly agree*      *agree*      *neutral*      *disagree*      *strongly disagree*

A yearly screening format would reduce the burden on district general education teachers.

*strongly agree*      *agree*      *neutral*      *disagree*      *strongly disagree*

Resources are limited in the district (e.g., personnel, time constraints, etc.) and therefore would make a yearly screening format for language impairment difficult.

*strongly agree*      *agree*      *neutral*      *disagree*      *strongly disagree*

Current caseload sizes of district speech-language pathologists would prohibit the district moving to a yearly screening format for language impairment identification.

*strongly agree*      *agree*      *neutral*      *disagree*      *strongly disagree*

Parents are a good choice to administer a language screening measure to students.

*strongly agree*      *agree*      *neutral*      *disagree*      *strongly disagree*

District teaching assistants are a good choice to administer a language screening measure to students.

*strongly agree*                      *agree*                      *neutral*                      *disagree*                      *strongly disagree*

District speech-language technicians are a good choice to administer a language screening measure to students.

*strongly agree*                      *agree*                      *neutral*                      *disagree*                      *strongly disagree*

District general education teachers are a good choice to administer a language screening measure to students.

*strongly agree*                      *agree*                      *neutral*                      *disagree*                      *strongly disagree*

Yearly screenings for language impairments could result in an increase in referrals for assessments by district speech-language pathologists. Response to Intervention (RTI) programs represent an effective method for reducing this increase.

*strongly agree*                      *agree*                      *neutral*                      *disagree*                      *strongly disagree*

(For SLPs only. GE teachers select "does not apply to me"): I would be willing to see an increase to my caseload due to screening for language impairment in order to better identify students with language impairment.

*strongly agree*                      *agree*                      *neutral*                      *disagree*                      *strongly disagree*  
*does not apply to me*

I am aware of research reporting the short and long-term impact of unidentified language impairment in school-aged children.

*strongly agree*                      *agree*                      *neutral*                      *disagree*                      *strongly disagree*

I am confident in my ability to identify students with a language disorder using evidence-based assessments.

*strongly agree*                      *agree*                      *neutral*                      *disagree*                      *strongly disagree*

I am confident in my ability to help/treat students with a language disorder using evidence-based interventions.

*strongly agree*                      *agree*                      *neutral*                      *disagree*                      *strongly disagree*

I feel I received adequate training regarding language impairment in my formal education (e.g., undergraduate, master's, or PhD program).

*strongly agree*                      *agree*                      *neutral*                      *disagree*                      *strongly disagree*

Children with language impairment in DSD have been an underserved population as compared to other groups (e.g., Autism, speech/articulation, ADHD, etc.)

*strongly agree*                      *agree*                      *neutral*                      *disagree*                      *strongly disagree*

I would support DSD in adopting a yearly screening format over the current referral-based format for the identification of children with language impairment.

*strongly agree*                      *agree*                      *neutral*                      *disagree*                      *strongly disagree*
